# Supplementary material for: Characterization of aerosol number size distributions and their effect on cloud properties at Syowa Station, Antarctica
Source: Copernicus journal article supplement (doi:10.5194/acp-21-12155-2021), 2021-08-13
Supplement: Supplementary file 1 [file acp-21-12155-2021-supplement.pdf]

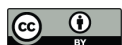

*Supplement of*

## **Characterization of aerosol number size distributions and their effect on cloud properties at Syowa Station, Antarctica**

**Keiichiro Hara et al.**

*Correspondence to:* Keiichiro Hara ([harakei@fukuoka-u.ac.jp](mailto:harakei@fukuoka-u.ac.jp))

The copyright of individual parts of the supplement might differ from the article licence.

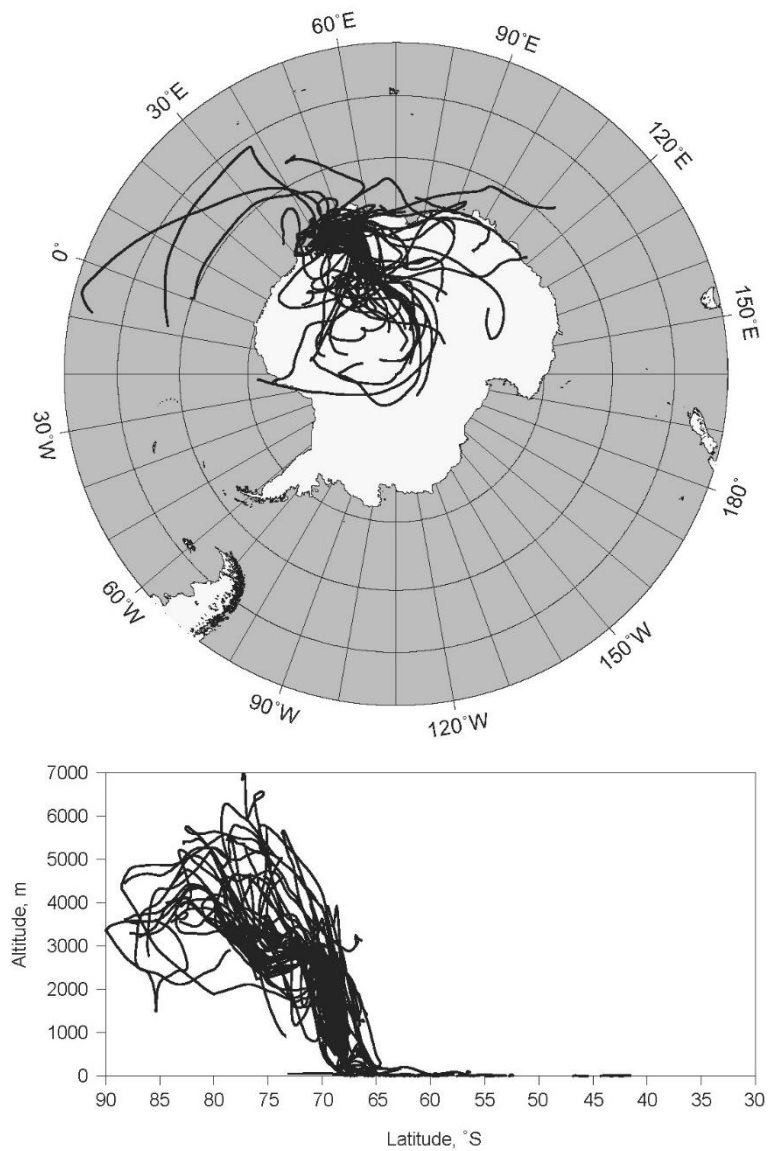

**Figure S1: Five-day backward trajectory under conditions with appearance of a quad modal structure including fresh nucleation mode at Syowa Station during 2004–2006. Altitude represents height above ground level. Trajectory was calculated from altitude at 500 m above ground level over Syowa Station (69°S).**

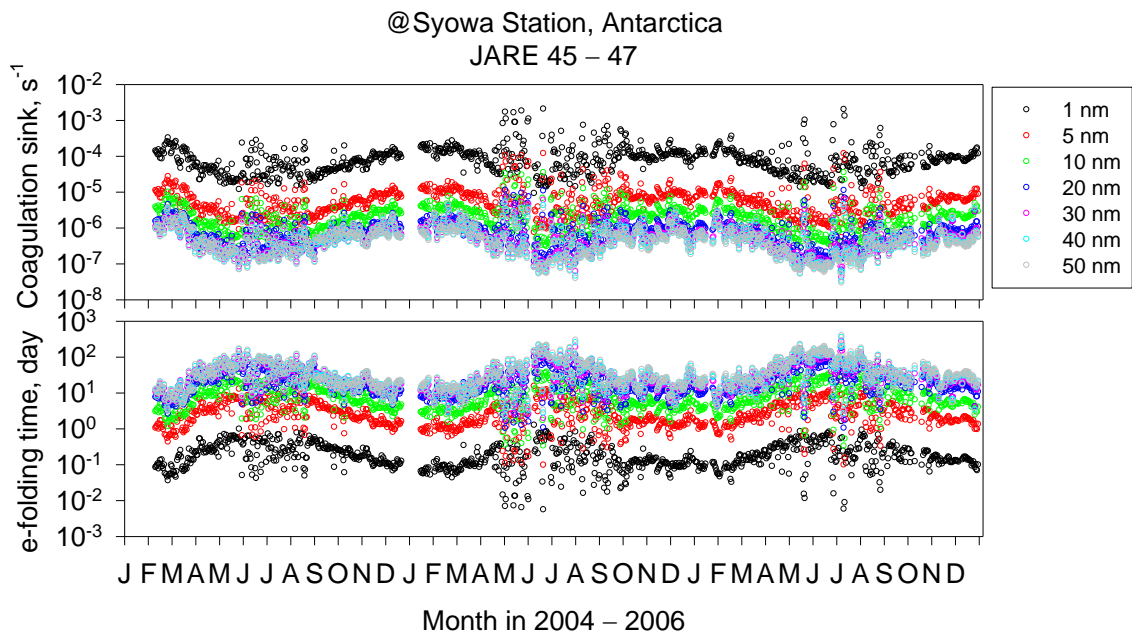

**Figure S2: Seasonal variations of coagulation sink and e-folding time by coagulation loss at Syowa Station, Antarctica during 2004–2006.**

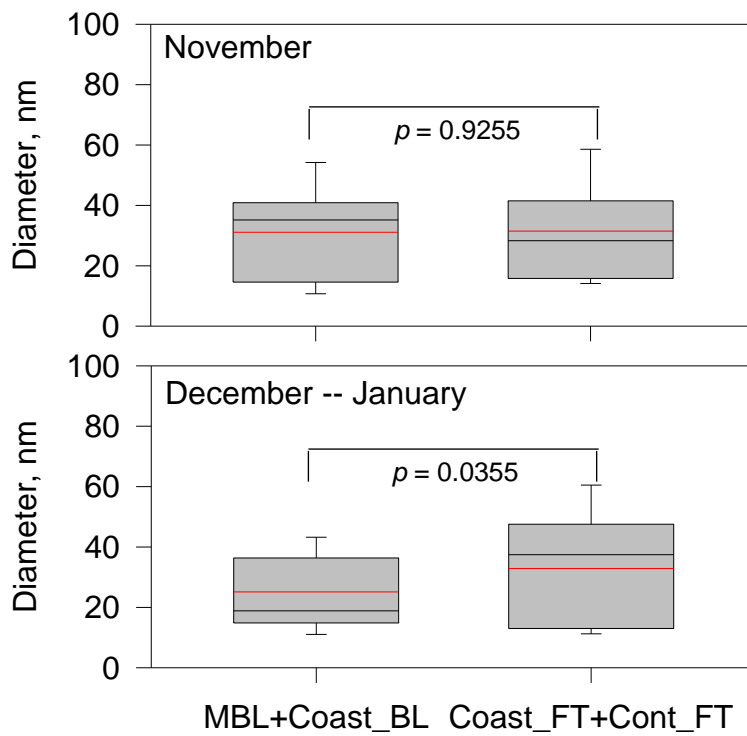

Figure S3: Modal size of the mode with smallest modal size in November and December.  $p$  denote  $p$ -value of ANOVA variance test. Degrees of freedom for the ANOVA variance test were 155. Box plots show values of 90, 75, 50 (median), 25, and 10%, denoted respectively by the top bar, top box line, black middle box line, bottom box line, and bottom bar. Red lines show mean values.

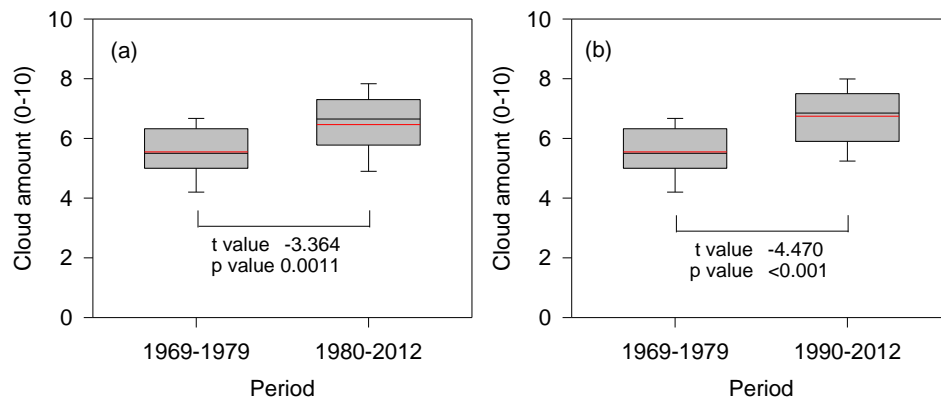

**Figure S4: Cloud amounts for (a) 1969–1979 and 1980–2012, and (b) 1969–1979 and 1990–2012.  $t$  and  $p$  respectively denote  $t$ -values and  $p$ -values of  $t$ -tests. Degrees of freedom for the  $t$ -tests were (a) 86 and (b) 66. The period of 1980–1989 corresponded to ozone hole expansion. Box plots show values of 90, 75, 50 (median), 25, and 10%, denoted respectively by the top bar, top box line, black middle box line, bottom box line, and bottom bar. Red lines show mean values.**
